# Supplementary material
Source: PubMed Central journal article supplement (PMC5805946)

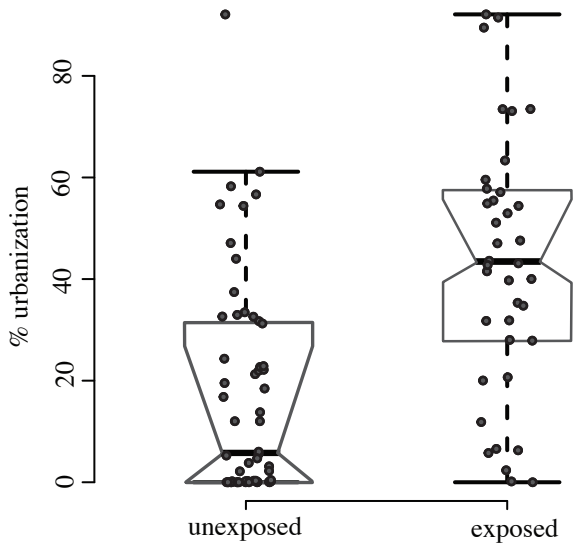

AR residue test result (blood-based)

Supplement: rspb20172533supp3.pdf [file rspb20172533supp3.pdf]

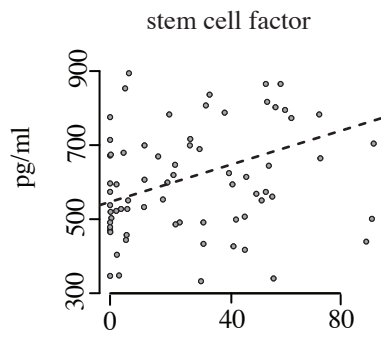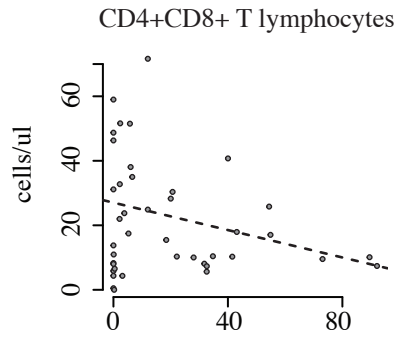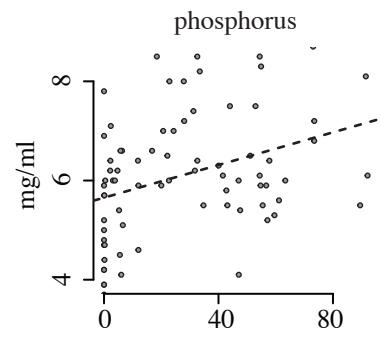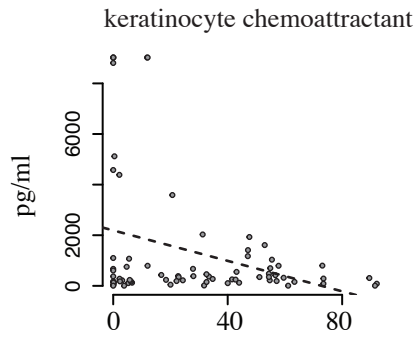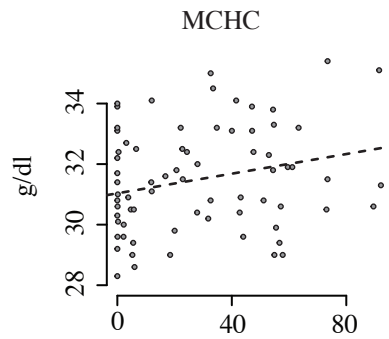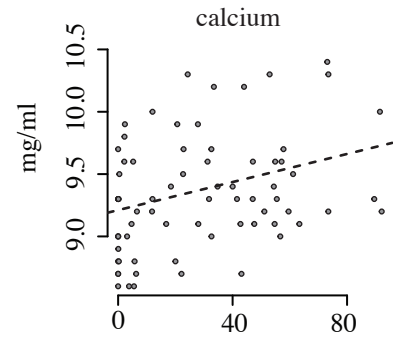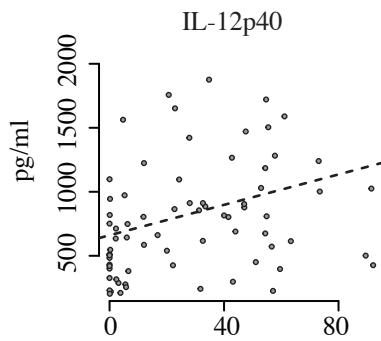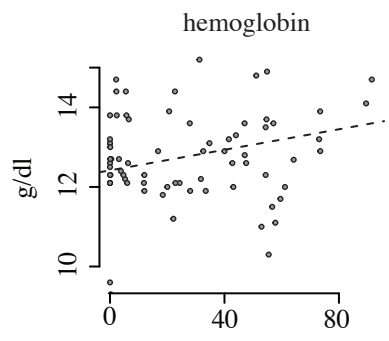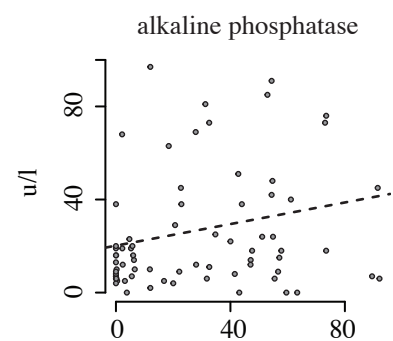

% urban area

Supplement: rspb20172533supp4.pdf [file rspb20172533supp4.pdf]

**RF without land use**

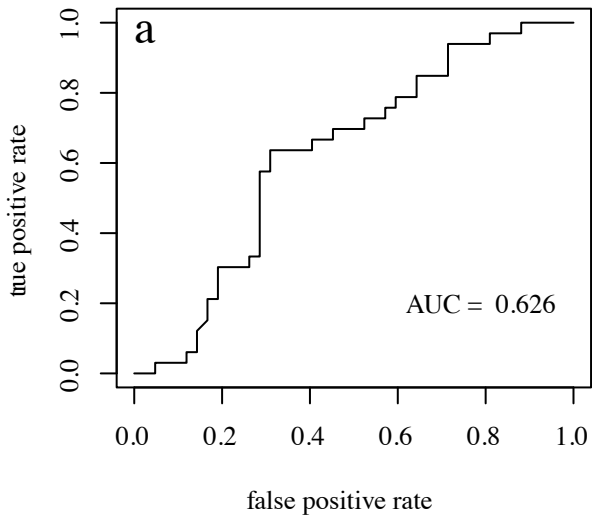

**RF with land use**

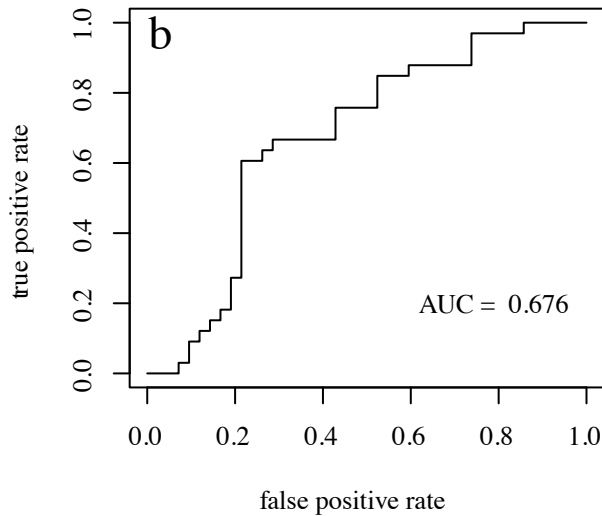

Supplement: rspb20172533supp5.pdf [file rspb20172533supp5.pdf]
